# Supplementary material for: MultiMSOAR 2.0: An Accurate Tool to Identify Ortholog Groups among Multiple Genomes
Source: PubMed Central journal article supplement (PMC3119667; doi:10.1371/journal.pone.0020892), 2011-06-21
Supplement: pone.0020892.s001.pdf [file pone.0020892.s001.pdf]

# Materials S1

## Additional Experimental Results on Simulated Data

The accuracies of MultiMSOAR 2.0 and Notung in inferring gene births, losses and duplications on simulated data are summarized in the following tables. In each table, the first number in a cell gives the accuracy of MultiMSOAR 2.0 while the second corresponds to Notung.

**Table S1:** Prediction accuracy when the parameter  $S$  (the number of species) is varied.

| $S$                         | 3               | 5               | 7               | 9               | 11              |
|-----------------------------|-----------------|-----------------|-----------------|-----------------|-----------------|
| GeneBirth Sensitivity       | 95.00% / -      | 100.0% / -      | 100.0% / -      | 96.25% / -      | 87.00% / -      |
| GeneBirth Specificity       | 71.00% / -      | 84.89% / -      | 84.64% / -      | 85.23% / -      | 93.90% / -      |
| GeneDuplication Sensitivity | 89.38% / 71.88% | 89.06% / 61.56% | 89.38% / 58.13% | 87.66% / 55.47% | 79.88% / 54.88% |
| GeneDuplication Specificity | 99.33% / 59.61% | 92.81% / 39.17% | 92.70% / 22.65% | 93.83% / 18.88% | 94.64% / 17.10% |
| GeneLoss Sensitivity        | 47.50% / 0.00%  | 63.21% / 0.00%  | 66.67% / 0.83%  | 73.13% / 1.38%  | 84.63% / 2.00%  |
| GeneLoss Specificity        | 93.33% / 0.00%  | 81.75% / 0.00%  | 77.63% / 0.48%  | 74.74% / 0.05%  | 52.74% / 0.11%  |

**Table S2:** Prediction accuracy when the parameter  $E$  (the number of evolutionary events) is varied.

| $E$                         | 5               | 10              | 15              | 20              |
|-----------------------------|-----------------|-----------------|-----------------|-----------------|
| GeneBirth Sensitivity       | 96.67% / -      | 100.0% / -      | 96.25% / -      | 96.88% / -      |
| GeneBirth Specificity       | 76.38% / -      | 84.89% / -      | 76.78% / -      | 76.48% / -      |
| GeneDuplication Sensitivity | 91.88% / 60.00% | 89.06% / 61.56% | 85.83% / 62.08% | 83.91% / 60.16% |
| GeneDuplication Specificity | 96.91% / 37.61% | 92.81% / 39.17% | 95.17% / 32.69% | 92.87% / 29.46% |
| GeneLoss Sensitivity        | 53.81% / 0.00%  | 63.21% / 0.00%  | 62.08% / 2.50%  | 45.42% / 2.59%  |
| GeneLoss Specificity        | 74.17% / 0.00%  | 81.75% / 0.00%  | 69.92% / 0.13%  | 74.58% / 0.14%  |

**Table S3:** Prediction accuracy when the parameter  $\mu$  (evolver branch length) is varied.

| $\mu$                       | 0.01            | 0.03            | 0.05            | 0.07            | 0.15            |
|-----------------------------|-----------------|-----------------|-----------------|-----------------|-----------------|
| GeneBirth Sensitivity       | 97.50% / -      | 97.50% / -      | 100.0% / -      | 98.75% / -      | 98.75% / -      |
| GeneBirth Specificity       | 82.22% / -      | 79.75% / -      | 84.89% / -      | 78.44% / -      | 54.02% / -      |
| GeneDuplication Sensitivity | 86.56% / 61.88% | 92.81% / 61.25% | 89.06% / 61.56% | 86.41% / 61.41% | 95.00% / 58.75% |
| GeneDuplication Specificity | 90.88% / 36.71% | 93.80% / 37.96% | 92.81% / 39.17% | 92.94% / 37.48% | 89.92% / 31.10% |
| GeneLoss Sensitivity        | 60.89% / 1.25%  | 65.00% / 0.00%  | 63.21% / 0.00%  | 59.55% / 0.00%  | 58.75% / 0.00%  |
| GeneLoss Specificity        | 75.51% / 0.18%  | 89.11% / 0.00%  | 81.75% / 0.00%  | 82.79% / 0.00%  | 87.03% / 0.00%  |

**Table S4:** Prediction accuracy when the parameter  $\alpha$  (the ratio of duplication events) is varied.

| $\alpha$                    | 20%             | 30%             | 40%             | 50%             | 60%             |
|-----------------------------|-----------------|-----------------|-----------------|-----------------|-----------------|
| GeneBirth Sensitivity       | 98.75% / -      | 97.50% / -      | 100.0% / -      | 100.0% / -      | 97.50% / -      |
| GeneBirth Specificity       | 79.00% / -      | 81.50% / -      | 84.89% / -      | 80.00% / -      | 80.44% / -      |
| GeneDuplication Sensitivity | 93.13% / 61.25% | 93.33% / 61.67% | 89.06% / 61.56% | 86.00% / 61.25% | 87.29% / 61.25% |
| GeneDuplication Specificity | 94.44% / 37.80% | 95.32% / 36.75% | 92.81% / 39.17% | 94.44% / 37.49% | 95.31% / 38.21% |
| GeneLoss Sensitivity        | 71.25% / 0.00%  | 67.50% / 0.00%  | 63.21% / 0.00%  | 64.58% / 0.00%  | 60.71% / 1.25%  |
| GeneLoss Specificity        | 96.90% / 0.00%  | 90.00% / 0.00%  | 81.75% / 0.00%  | 75.32% / 0.00%  | 78.18% / 0.56%  |

## A Graphical Illustration of Genome-Level Evolutionary Events

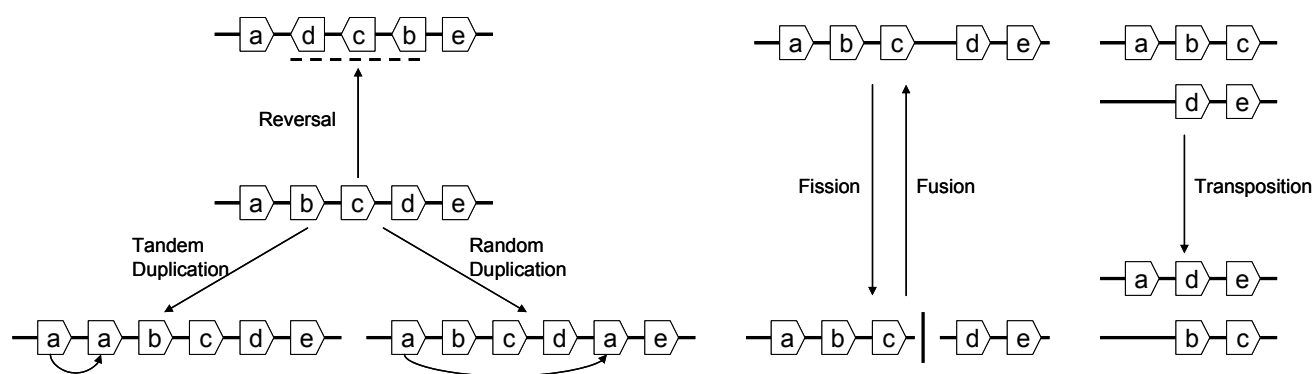

**Figure S2:** Genome-level evolutionary events considered in the simulation.
